1 **White matter microstructure is associated with the precision of visual working memory**

2

3 Xuqian Li<sup>1</sup>, Dragan Rangelov<sup>2</sup>, Jason B. Mattingley<sup>2,3,4</sup>, Lena Oestreich<sup>1,6</sup>, Delphine Lévy-  
4 Bencheton<sup>1</sup>, Michael J. O'Sullivan<sup>1,5,7</sup>

5

6 <sup>1</sup>UQ Centre for Clinical Research, The University of Queensland, Brisbane, Australia

7 <sup>2</sup>Queensland Brain Institute, The University of Queensland, Brisbane, Australia

8 <sup>3</sup>School of Psychology, The University of Queensland, Brisbane, Australia

9 <sup>4</sup>Canadian Institute for Advanced Research, Toronto, Canada

10 <sup>5</sup>Institute for Molecular Bioscience, The University of Queensland, Brisbane, Australia

11 <sup>6</sup>Centre for Advanced Imaging, The University of Queensland, Brisbane, Australia

12 <sup>7</sup>Department of Neurology, Royal Brisbane and Women's Hospital, Brisbane, Australia

13

14 Correspondence concerning this article should be addressed to Xuqian Li, UQ Centre for  
15 Clinical Research, Building 71/918, Royal Brisbane and Women's Hospital Campus,  
16 Herston, QLD 4029, Australia. Email address: [xuqian.li@uq.edu.au](mailto:xuqian.li@uq.edu.au).

1

## Abstract

2 Visual working memory is critical for goal-directed behaviour as it maintains continuity  
3 between previous and current visual input. Functional neuroimaging studies have shown that  
4 visual working memory relies on communication between distributed brain regions, which  
5 implies an important role for long-range white matter connections in visual working memory  
6 performance. Here, we characterised the relationship between the microstructure of white  
7 matter association tracts and the precision of visual working memory representations. To that  
8 purpose, we devised a delayed estimation task which required participants to reproduce visual  
9 features along a continuous scale. A sample of 80 healthy adults performed the task and  
10 underwent diffusion-weighted MRI. We applied mixture distribution modelling to quantify the  
11 precision of working memory representations and guess rates, both of which contribute to  
12 observed responses. Latent components of tract-specific microstructural indices were identified  
13 by principal component analysis. Higher working memory precision was associated with lower  
14 bulk diffusion across ten tracts of interest and higher directionality of diffusion in a group of  
15 frontoparietal-occipital tracts. Importantly, there was no association between guess rates and  
16 any of the structural components. Our findings suggest that microstructural properties of white  
17 matter tracts connecting posterior and frontal brain regions mediate, in a functionally specific  
18 manner, the precision of visual working memory.

19 *Keywords:* visual working memory, delayed estimation task, mixture distribution modelling,  
20 white matter microstructure, principal component analysis, brain-behaviour associations.

## 1 **1. Introduction**

2 Visual working memory involves active maintenance and manipulation of visual  
3 information over a short period of time. It supports a range of cognitive functions and  
4 contributes to goal-directed behaviour (Awh & Jonides, 2001; de Fockert et al., 2001;  
5 Gathercole et al., 2004; Henderson et al., 2014). Functional magnetic resonance imaging  
6 (fMRI) and positron emission tomography (PET) studies have shown that visual working  
7 memory relies on a widespread network of brain regions including the lateral prefrontal  
8 cortex, anterior insula, posterior parietal cortex, inferior temporal cortex, and early visual  
9 cortex (Daniel et al., 2016; Owen et al., 2005; Rottschy et al., 2012; Wager & Smith, 2003).  
10 Recent studies using network-based approaches have shown increased global efficiency and  
11 decreased modularity of functional networks during working memory compared with rest,  
12 potentially supporting coordinated neural activity (Dagenbach, 2019). The idea that visual  
13 working memory relies on communication across a large-scale network implies a critical role  
14 for long-range white matter connections that support information transmission in the brain  
15 (Düzel et al., 2010; Pajevic et al., 2014). Here, we characterised the relationship between  
16 white matter microstructure and visual working memory performance in a large sample of  
17 neurotypical adult humans.

18 Previous studies have related visual working memory performance to white matter  
19 microstructure in several long-range association tracts (Lazar, 2017). In particular, the  
20 superior longitudinal fasciculus (SLF), a major pathway that connects the parietal and frontal  
21 lobes (Makris et al., 2005), has been related to visual working memory performance (Darki &  
22 Klingberg, 2015; Vestergaard et al., 2011). The SLF can be further divided into dorsal (SLF  
23 I), middle (SLF II), and ventral components (SLF III), with different patterns of connectivity  
24 to other brain regions and, arguably, distinct functional specialization (Makris et al., 2005;  
25 Parlatini et al., 2017; Thiebaut de Schotten et al., 2011). Further, the inferior frontal-occipital  
26 fasciculus (IFOF), a tract that mediates direct communication between occipital and frontal  
27 lobes (Forkel et al., 2014), has also been associated with visual working memory (Krogsrud  
28 et al., 2018; Peters et al., 2014; Walsh et al., 2011). Finally, the inferior longitudinal  
29 fasciculus (ILF), a temporal-occipital tract that runs more superficially and ventrally than the  
30 IFOF (Herbet et al., 2018), also plays a role in modulating visual working memory function,  
31 based on evidence from healthy children and case studies of focal lesions (Krogsrud et al.,  
32 2018; Shinoura et al., 2007). In the current study, we focused on the relationship between

1 visual working memory performance and five critical tracts-of-interest (TOIs): the SLF I,  
2 SLF II, SLF III, IFOF and ILF.

3 Conceptually, participant responses in visual working memory tasks can reflect a true  
4 but noisy memory representations of target items or random guesses originating from  
5 attentional lapses, poor task compliance or other factors. Unfortunately, previous  
6 investigations that aimed to relate visual working memory performance to white matter  
7 microstructure did not distinguish these sources of behavioural variability (Darki &  
8 Klingberg, 2015; Krogsrud et al., 2018; Nagy et al., 2004; Peters et al., 2014; Vestergaard et  
9 al., 2011; Walsh et al., 2011). The overarching goal of the current study was to use  
10 computational modelling of behaviour to independently characterise contributions of white  
11 matter microstructure to these theoretically distinct components of visual working memory  
12 performance.

13 To evaluate visual working memory performance, we developed a novel version of  
14 the delayed estimation paradigm (Emrich et al., 2013; Gorgoraptis et al., 2011; Taylor &  
15 Bays, 2020), which required participants to encode three visual gratings that varied in both  
16 their spatial location and orientation. After a short delay period, participants reproduced, on a  
17 continuous scale, either the location or orientation of only one of the gratings, as indicated by  
18 a probe which appeared after the memory maintenance period. The different features to be  
19 retrieved (location and orientation) were included to test the extent to which brain-behaviour  
20 associations are similar across the spatial and non-spatial domains of visual working memory.  
21 Having participants respond on a continuous scale allowed us to calculate error magnitudes  
22 that could be modelled using mixture distribution modelling to independently estimate *the*  
23 *precision* of “true” working memory responses and *the proportion of responses arising from*  
24 *random guessing* (Bays et al., 2009; Zhang & Luck, 2008). To decrease dimensionality of the  
25 white matter microstructural data, we used a two-step principal component analysis (PCA) to  
26 estimate latent components over different *measures* and different *tracts*. If the microstructure  
27 of long-range white matter tracts selectively affects the precision of visual working memory  
28 representations, then the structural components should correlate exclusively with response  
29 precision but not with random guess rates. Additionally, if the brain-behaviour relationships  
30 are common for different features in visual working memory, there should be no difference  
31 between the location and orientation tasks for any of the observed associations.

## 32 **2. Methods**

## 1 2.1. Participants

2 Eighty-seven healthy adult volunteers were recruited from The University of  
3 Queensland through an online volunteer system. Seven participants were excluded from  
4 subsequent analyses due to data corruption ( $n = 4$ ) or incomplete MRI data ( $n = 3$ ). The final  
5 sample included 80 participants aged from 18 to 38 years ( $M = 24.24$ ,  $SD = 4.61$ ; 39  
6 females). All participants completed safety screening questionnaires and provided written  
7 informed consent before the experimental sessions. Participants were reimbursed at a rate of  
8 \$20 per hour. The study was approved by the Human Research Ethics Committee of The  
9 University of Queensland.

## 10 2.2. Experiment

### 11 2.2.1. Apparatus

12 Stimuli were displayed on an LCD monitor (VG248QE) with a resolution of  
13  $1920 \times 1080$  pixels and a refresh rate of 60 Hz. Participants were seated approximately 60 cm  
14 from the monitor in a dimly illuminated room, with their head position maintained with a  
15 chinrest. The experiment was implemented under MATLAB R2018a (MathWorks, Natick,  
16 MA) using Psychtoolbox (Brainard, 1997; Pelli, 1997). Eye position was recorded using a  
17 desk-mounted eye-tracking system sampled at 120 Hz (iView RED-m infrared eye tracker,  
18 SensoMotoric Instruments, Teltow, Germany). The eye-tracker was calibrated and validated  
19 before each experimental block using a five-point calibration grid. The experiment was  
20 performed concurrently with electroencephalography (EEG) recording but the EEG data are  
21 not reported in this manuscript.

### 22 2.2.2. Visual Working Memory Experiment

23 The location and orientation versions of the visual working memory tasks were  
24 presented in separate blocks in random order for each participant (Fig. 1). In each trial,  
25 participants were first presented with a black central cross (size: 1.32 degrees in visual angle  
26 [dva]; RGB: 0, 0, 0; line thickness: 0.13 dva) and a black arrow (RGB: 0, 0, 0; width: 2.64  
27 dva; height: 0.66 dva) located 2.64 dva above the fixation for 300 ms, reminding the  
28 participants to encode only items on the left or right side of the screen. The “Cue” display  
29 was followed by the “Encoding” display presented for 400 ms and comprising six oriented  
30 gratings (radius: 2.64 dva). The gratings were randomly arranged on an invisible circle  
31 (radius: 10.55 dva) with respect to their centre. Any two adjacent gratings were separated by

1 at least 20° and maximally 90° centre-to-centre offset and no grating was presented within  
 2 ±15° range from the vertical midline. The grating orientations were randomly sampled over a  
 3 0°-179° range in increments of 2°. Following the encoding display, the “Maintenance”  
 4 display appeared for 900 ms, comprising only the central fixation. Next, depending on the  
 5 task, a “Probe” display showing either the location or orientation of one of the memorized  
 6 gratings on the cued side was presented for 700 ms. Participants were instructed to maintain  
 7 fixation until the “Response” display. If an eye movement or blink was detected, a trial was  
 8 discarded and replayed at the end of the block.

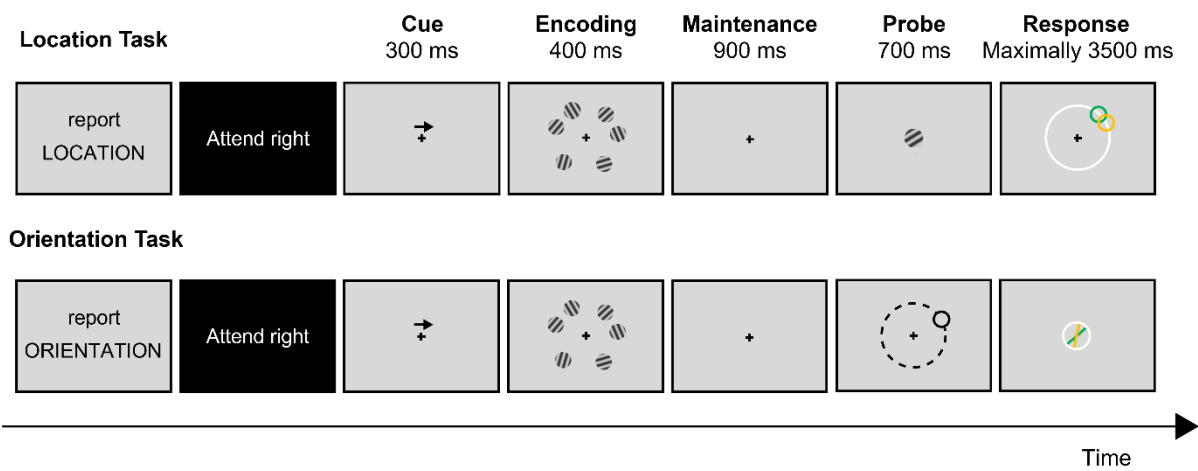

9

10 **Figure 1.** Schematic Illustration of the Location and Orientation Tasks. At the start of each  
 11 block, an instruction message appeared to indicate the subsequent task. At the beginning of  
 12 each run, a message appeared on a black background to remind participants to encode items  
 13 presented on either the left side or right side. In each trial, six gratings were presented during  
 14 the encoding period. After a 900 ms delay period, participants provided a response based on  
 15 the probe information.

16 For the location task, one of the memorized gratings on the cued side was presented in  
 17 the centre of the probe display. This probe item displayed the orientation of one of the three  
 18 presented gratings on the cued side, independently of its location. Simultaneously with probe  
 19 disappearance, a white response circle appeared in the “Response” display in the middle of  
 20 the screen (radius: 10.55 dva; RGB: 255, 255, 255; line thickness: 0.13 dva). Participants  
 21 reported the location of the target grating on the response circle using a computer mouse. At  
 22 the beginning of the response display, the mouse cursor was set to the centre of the screen.  
 23 Immediately after participants moved the cursor, a smaller black circle (radius: 2.64 dva;  
 24 RGB: 0, 0, 0) was revealed with a red dot (radius: 0.66 dva; RGB: 255, 0, 0) placed at its  
 25 centre. While moving the mouse, both circle and red dot were locked to the cursor movement  
 26 to allow participants to adjust their response. A maximum of 3500 ms was set for the

1 response period. Once a response was made, or at the end of the response period, a green  
2 feedback circle (radius: 2.64 dva; RGB: 0, 255, 0) representing the correct location of the  
3 probed item was shown for 1000 ms.

4 For the orientation task, a black circle outline (radius: 2.64 dva; RGB: 0, 0, 0)  
5 corresponding to the exact location of one of the three gratings on the cued side was  
6 presented in the probe display. This probe item displayed the spatial location of one of the  
7 three presented gratings on the cued side, independently of its orientation. Simultaneously  
8 with probe disappearance, a white response circle appeared in the “Response” display in the  
9 middle of the screen (radius: 2.64 dva; RGB: 255, 255, 255; line thickness: 0.13 dva).  
10 Participants reported the orientation of the target grating using the mouse. Similar to the  
11 location task, the mouse cursor was set to the centre of the screen. As soon as participants  
12 started moving the cursor, a yellow line (RGB: 255, 255, 0; line thickness: 0.13 dva) inside  
13 the response circle was revealed and locked to the cursor movement. This helped the  
14 participants to adjust their response within a maximum response period of 3500 ms.  
15 Immediately following the response, or at the end of the response period, a green feedback  
16 line (RGB: 0, 255, 0; line thickness: 0.13 dva) representing the correct orientation was shown  
17 for 1000 ms.

18 Prior to the main experiment, all participants completed one practice block for each  
19 task with four trials per cued side (2 tasks  $\times$  2 cues  $\times$  4 trials = 16 trials). The main  
20 experiment consisted of four randomized blocks so that each of the tasks was presented  
21 twice. Each block contained two runs in which participants were cued to encode items on the  
22 left side of the screen, and two runs in which participants were cued to encode items on the  
23 right side, and these alternated with each other. The runs were counterbalanced across  
24 participants, with some participants always starting with right-side cues, and others with left-  
25 side cues. Each block comprised 120 trials, with 30 trials per run. A total of 480 trials were  
26 collected from each participant.

### 27 2.3. Behavioural Analysis

28 To examine the quality of behavioural data, *response error magnitude* in each trial  
29 was computed as the angular difference between the participant’s response and the  
30 objectively correct location or orientation of the cued item. The error magnitude for the  
31 orientation task ranged between  $0^\circ$  and  $\pm 90^\circ$ . In the location task, by contrast, the error  
32 magnitude ranged between  $0^\circ$  and  $\pm 180^\circ$ , with errors larger than  $\pm 90^\circ$  indicating that

1 participants selected a location in the uncued hemifield. Initial data inspection indicated that  
2 participants never made such “hemifield-swap” errors, so subsequent analyses considered  
3 location in the same manner as orientation, with error magnitudes ranging between  $0^\circ$  and  
4  $\pm 90^\circ$ . For both tasks, the error magnitudes were transformed from degrees to pi radians ( $\pi$ rad)  
5 with  $0^\circ$  and  $\pm 90^\circ$  mapped to  $0 \pi$ rad and  $\pm 1 \pi$ rad, respectively. The error distribution for each  
6 participant was then compared against a uniform distribution using the Kolmogorov-Smirnov  
7 test (Massey, 1951). A uniform distribution is expected if a participant guesses in a majority  
8 of experimental trials. Based on this criterion, eight participants were excluded from further  
9 analyses, leaving a total of 72 participants (36 females; 18-38 years;  $M = 24.31$ ,  $SD = 4.77$ )  
10 for the following analyses.

11 To quantify performance on the task, a probabilistic model introduced by Bays et al.  
12 (2009) was applied to trials where participants made a response. This model attributes  
13 response error to a mixture of three components: (a) the von Mises distribution for the target  
14 orientation/location, (b) the von Mises distribution for the non-target orientations/locations,  
15 and (c) a uniform distribution for random guesses. Technical details of this model have been  
16 described elsewhere (Bays et al., 2009). In brief, the model is defined as the probability of  
17 reporting the target item ( $P_T$ ), the probability of reporting the non-target items ( $P_{NT}$ ), the  
18 probability of random guessing ( $P_G$ ), and the concentration parameter  $\kappa$  of the von Mises  
19 distribution that described the variability around the target value. The non-target items in both  
20 the location and orientation tasks were defined as the two unprobed items presented on the  
21 cued side. The maximum likelihood estimates of the parameters were obtained separately for  
22 each participant in each task and cued side using an expectation-maximization algorithm. The  
23 fitted von Mises  $\kappa$  was converted to circular standard deviation ( $\sigma_{VM}$ ) as defined by Fisher  
24 (1995), giving a measure of *response precision* which reflects the precision of representations  
25 stored in visual working memory (Bays, Gorgoraptis, et al., 2011; Bays, Wu, et al., 2011;  
26 Pratte et al., 2017).  $P_G$  measures the *random guess rates* which reflect the proportion of  
27 responses originating from task-irrelevant factors.

28 A preliminary repeated-measures ANOVA on response precision, with task (location,  
29 orientation) and cued side (left, right) as the within-subject variables, showed no significant  
30 main effect of cued side and no significant interaction between task and cued side (all  $ps \gg$   
31 0.05). Therefore, the mixture model was refitted to error distributions with trials aggregated  
32 across cued sides. Paired-samples  $t$ -tests were then performed to compare  $\sigma_{VM}$  and  $P_G$



1 between the location and orientation tasks. The task effect on  $P_{NT}$ , or so-called “*swap errors*”  
2 describing a feature binding anomaly in working memory where a non-target feature is  
3 “swapped in” for the target feature (Bays, 2016; Schneegans & Bays, 2017) was also  
4 investigated. The mixture distribution modelling was performed in MATLAB R2020a using  
5 the Analogue Report Toolbox (Bays et al., 2009; Schneegans & Bays, 2016). All statistical  
6 analyses were carried out using R v4.1.0 (R Core Team, 2021).

## 7 *2.4. Neuroimaging Analysis*

### 8 *2.4.1. Image Acquisition*

9 Participants underwent MRI scans using a Siemens Magnetom Prisma 3T system at  
10 the Centre for Advanced Imaging at The University of Queensland. T1-weighted structural  
11 scans were obtained with a magnetisation-prepared two rapid acquisition gradient echo  
12 (MP2RAGE) sequence (Marques et al., 2010), with 240 mm field-of-view (FoV), 176 slices,  
13 0.9 mm isotropic resolution, TR = 4000 ms, TE = 2.92 ms, TI 1 = 700 ms, TI 2 = 2220 ms,  
14 first flip angle = 6°, second flip angle = 7°, and 5-6 minutes of acquisition time. Diffusion-  
15 weighted image (DWI) series were acquired using an echo-planar imaging (EPI) sequence  
16 with FoV of 244 mm, 70 slices, 2 mm isotropic resolution, TR = 4100 ms, TE = 84 ms, in  
17 106 diffusion-sensitization directions. Diffusion weightings of  $b = 0, 200, 500, 1000,$  and  
18  $3000 \text{ s/mm}^2$  were applied in 10, 6, 10, 20, and 60 directions, respectively. In addition, 11  $b =$   
19  $0 \text{ s/mm}^2$  images were acquired with reverse phase encoding. The DWI sequence lasted  
20 approximately 7-8 minutes.

### 21 *2.4.2. Image Pre-processing*

22 Image pre-processing was conducted using tools in MRtrix3 (v3.0\_RC3; Tournier et  
23 al., 2019) and FSL (v6.0.4 FMRIB Software Library; Smith et al., 2004). DWI were denoised  
24 and corrected for susceptibility induced field, subject movement, eddy-current induced  
25 distortions, and signal intensity inhomogeneities (Andersson & Sotiropoulos, 2016; Cordero-  
26 Grande et al., 2019; Veraart et al., 2016; Zhang et al., 2001). A binary whole-brain mask was  
27 generated from the pre-processed DWI using the Brain Extraction Tool (BET; Smith, 2002).  
28 T1-weighted images were brain extracted with the HD-BET algorithm, a new tool that has  
29 been validated on several large datasets and multiple MR sequences (Isensee & Hucho,  
30 2019). Compared with similar tools, HD-BET provided a better automated extraction of our  
31 T1 images. Manual editing of the extracted brain mask was applied when necessary. Finally,

1 the DWI were registered to the MNI 152 standard space with the B<sub>0</sub>-to-T1 and T1-to-standard  
2 transforms (Jenkinson et al., 2002).

### 3 2.4.3. Probabilistic Tractography

4 The SLF I, SLF II, SLF III, IFOF, and ILF in both hemispheres were reconstructed  
5 according to a standardised protocol using probabilistic tractography as implemented in the  
6 XTRACT toolbox in FSL (Fig. 2; de Groot et al., 2013; Warrington et al., 2020). To guide  
7 tractography, a ball-and-stick, crossing-fibre model was applied to the pre-processed DWI to  
8 estimate multiple fibre orientations in each voxel (Behrens et al., 2007; Jbabdi et al., 2012).  
9 Model parameters were estimated using a Bayesian Monte Carlo sampling technique.  
10 Probabilistic fibre tracking was then achieved by drawing sample streamlines from a seed  
11 along a diffusion orientation sampled from the posterior distribution at each voxel. A large  
12 number of samples built up a fibre probability distribution that reflected the number of  
13 streamlines connecting any single voxel to the seed masks (Behrens et al., 2007; Behrens et  
14 al., 2003). All parameters that constrained streamline propagation were set as default:  
15 curvature threshold =  $\pm 80^\circ$ , maximum streamline steps = 2000, step size = 0.5 mm  
16 (Warrington et al., 2020). To minimize the impact of partial volume contamination, diffusion  
17 tensor images corrected for cerebrospinal fluid (CSF) were obtained with a bi-tensor model  
18 as described in Pasternak et al. (2009). The resultant CSF-corrected images were used to  
19 generate diffusion tensor maps, from which the estimated mean of *fractional anisotropy*  
20 (FA), *mean diffusivity* (MD), *radial diffusivity* (RD), and *axial diffusivity* (AD) were  
21 extracted for all TOIs.

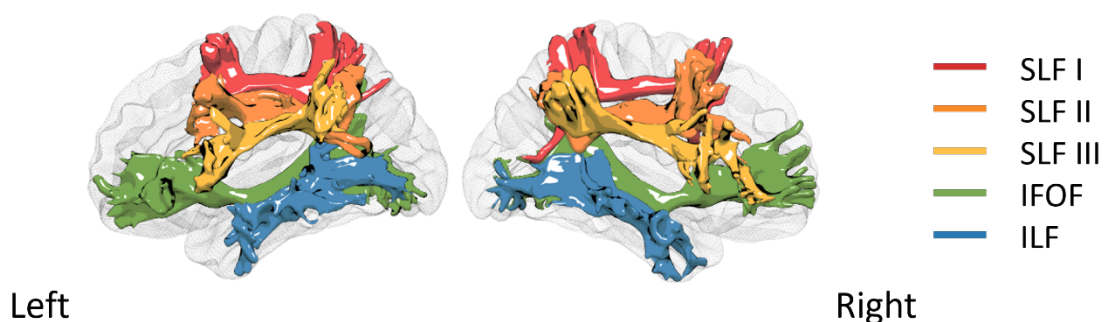

23 **Figure 2.** Probabilistic Tractography of Five Tracts of Interest in Both Hemispheres.  
24 Normalised streamline density maps from a representative participant were converted to 3D  
25 meshes for the purpose of visualization. *Abbreviations:* SLF, superior longitudinal fasciculus;  
26 IFOF, inferior frontal-occipital fasciculus; ILF, inferior longitudinal fasciculus.

### 27 2.4.4. Principal Component Analysis on Tractography Data

1 The tract-specific microstructural measures derived from each participant yielded a  
 2 total of 40 variables (4 diffusion tensor measures  $\times$  5 tracts  $\times$  2 hemispheres). To decrease  
 3 dimensionality of the microstructure data, PCA was applied to the tractography dataset. To  
 4 identify principal components (PCs) that reflected features in both the measure and tract  
 5 spaces, PCA was performed in a two-step fashion (Fig. 3). The first PCA was performed on  
 6 the concatenated data with participants and white matter tracts as observations (rows) and the  
 7 four diffusion tensor metrics as features (columns). The second PCA was performed on each  
 8 of the PCs extracted from the first PCA with the ten white matter tracts as features and  
 9 participants as observations. Two statistical tests were performed before each PCA to  
 10 determine whether the data were suitable for structure detection. The Kaiser-Meyer-Olkin  
 11 (KMO) Statistic measures the proportion of variance that might be caused by underlying  
 12 factors. High KMO values generally suggest the suitability of applying PCA (Kaiser & Rice,  
 13 1974). A KMO value lower than 0.5 is considered to render PCA inappropriate (Dziuban &  
 14 Shirkey, 1974). Bartlett's Test of Sphericity determines whether variables in a dataset are  
 15 correlated; if all variables were unrelated, a PCA would be inappropriate (Bartlett, 1951). The  
 16 above analyses were conducted using the 'REdaS' package (Maier, 2015). To obtain PCA  
 17 scores and loadings, singular value decomposition was applied to the mean-centred,  $z$ -  
 18 transformed data matrix using the 'mdatools' package (Kucheryayskiy, 2020). PCs with  
 19 eigenvalue  $> 1$  were retained (Cattell, 1966). Individual variables were considered to  
 20 contribute substantially to a PC if they explained more variance than that would be equally  
 21 explained by each variable (PC loading  $> 1/\text{number of variables}$ ).

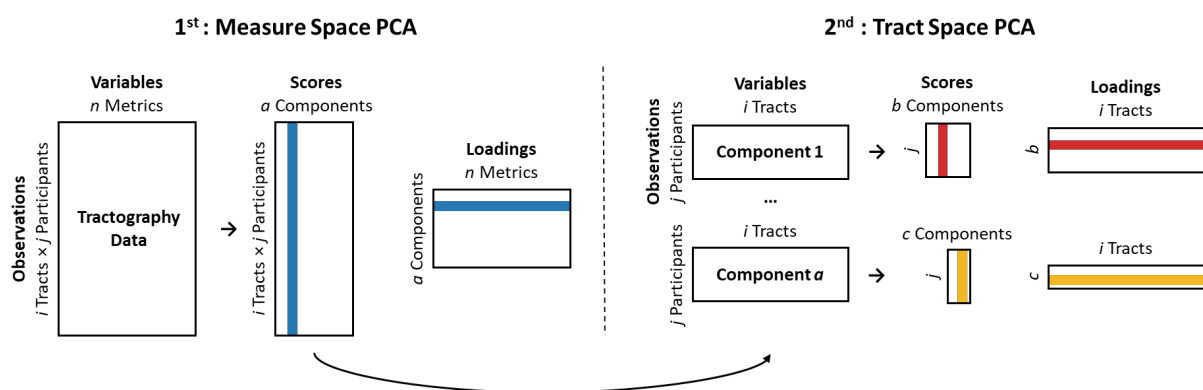

22  
 23 **Figure 3.** Schematic Illustration of Two-step Principal Component Analysis (PCA). The  
 24 measure space PCA aimed to capture covariations across different diffusion metrics with  
 25 participant and tract data as observations. Scores of the extracted components were then re-  
 26 structured for the tract space PCA which captured covariations across white matter tracts.

27 *2.5. Statistical Analysis*

1 To examine brain-behaviour relationships, linear mixed effects models were used to  
2 separately regress response precision ( $\sigma_{VM}$ ) and random guess rates ( $P_G$ ) on the identified PCs  
3 using R packages ‘lme4’ (Bates et al., 2015) and ‘lmerTest’ (Kuznetsova et al., 2017). The  
4 white matter underpinning of swap errors ( $P_{NT}$ ) was also investigated. To find the most  
5 parsimonious model that provided the best fit to the data, we adopted a step-up model  
6 building approach. This procedure starts with the construction of a base model, followed by  
7 the stepwise addition of predictor variables. Every new model is evaluated against a simpler  
8 model via the likelihood ratio test (LRT). In the present study, we tested fixed main effects of  
9 task (location vs. orientation) and all extracted PCs characterising white matter connectivity  
10 as well as their interactions. In the case of significant interactions, the corresponding main  
11 effect terms were also retained, even if the main effects were not statistically significant.  
12 Significant interactions were followed up using simple slope analysis as implemented in the  
13 ‘reghelper’ package (Hughes, 2021). Significance level was set at  $p < 0.05$ ;  $p$ -values for fixed  
14 effects were calculated using Satterthwaite approximations.

### 15 **3. Results**

#### 16 *3.1. Behavioural Results*

17 Distributions of error magnitudes were unimodal and centred on zero for both tasks  
18 (Fig. 4), indicating that participants were successful in reporting features of the target item.  
19 On average across participants, the estimated response precision was higher for the location  
20 task than for the orientation task ( $\sigma_{VM} = 0.40/0.01$  [M/SEM] vs.  $0.74/0.03$ ,  $t(71) = -10.40$ ,  $p <$   
21  $0.001$ ). The estimated random guess rates were lower for the location task than the orientation  
22 task ( $P_G = 0.02/0.01$  vs.  $0.36/0.03$ ,  $t(71) = 13.20$ ,  $p < 0.001$ ). Finally, the estimated swap  
23 errors were higher for the location task than the orientation task ( $P_{NT} = 0.34/0.01$  vs.  
24  $0.03/0.01$ ,  $t(71) = -28.10$ ,  $p < 0.001$ ).

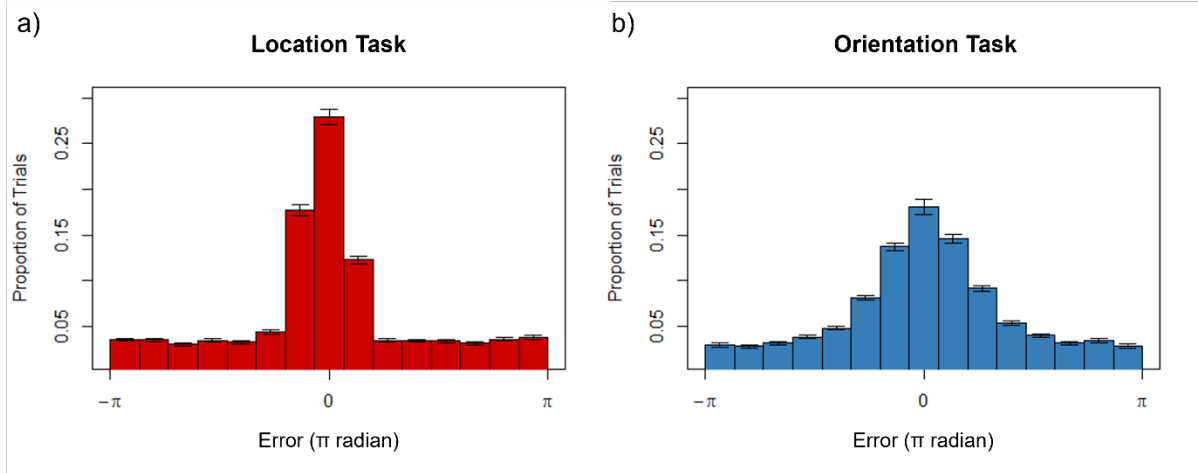

1

2 **Figure 4.** Distributions of Response Errors in Visual Working Memory Tasks. Results of the  
3 a) location task and b) orientation task are shown. Proportion of trials within each bin is  
4 averaged across participants. Error bars in each bin denote standard errors of the mean.

### 5 3.2. Principal Component Analysis on Tractography Data

6 The PCA over diffusion tensor measures identified two PCs that collectively  
7 accounted for 99.73% of the variance (KMO: 0.50; Bartlett's Test:  $\chi^2 = 8389.99$ ,  $p < 0.001$ ).  
8 The first component (PC<sub>1</sub>) explained 74.5% of the variance, with FA and AD loading  
9 negatively and RD loading positively (Table S1). As higher scores on PC<sub>1</sub> reflect a lower  
10 extent of anisotropic diffusion (Basser, 1995; Beaulieu, 2002), PC<sub>1</sub> therefore represents  
11 decreases in *directionality*. The loading profile of PC<sub>1</sub> was replicated by a complementary  
12 PCA on the three eigenvalues of the diffusion tensor (see Supplementary Results). The  
13 second PC (PC<sub>2</sub>) explained 25.2% of the variance, with MD loading negatively (Table S1).  
14 PC<sub>2</sub> was therefore considered to represent the bulk mean magnitude of the diffusion process  
15 (labelled as "*bulk diffusion*"). To facilitate subsequent analysis, scores of PC<sub>2</sub> were multiplied  
16 by  $-1$  to represent increases in bulk diffusion. In brief, the measure-space PCA yielded a  
17 two-component solution, each of which represents a distinct aspect of the diffusion process.

18 Participant scores for each of the extracted PCs from the measure-space PCA were  
19 next submitted to the tract-space PCA to capture covariance across TOIs. For directionality,  
20 the tract-space PCA extracted three orthogonal PCs (eigenvalues  $> 1$ ) which collectively  
21 explained 63.1% of the variance (KMO: 0.69; Bartlett's Test:  $\chi^2 = 219.17$ ,  $p < 0.001$ ), and  
22 loaded onto three distinct groups of tracts (Fig. 5; Table S1). For bulk diffusion, the tract-  
23 space PCA yielded a clear single component that explained 71.5% of the variance (KMO:  
24 0.92; Bartlett's Test:  $\chi^2 = 726.50$ ,  $p < 0.001$ ), with all TOIs loading equally and positively on

1 the extracted component (Fig. 5; Table S1). To summarize, four structural components,  
2 namely  $PC_{DIR,1}$ ,  $PC_{DIR,2}$ ,  $PC_{DIR,3}$ , and  $PC_{BULK}$ , were extracted from the tractography data.

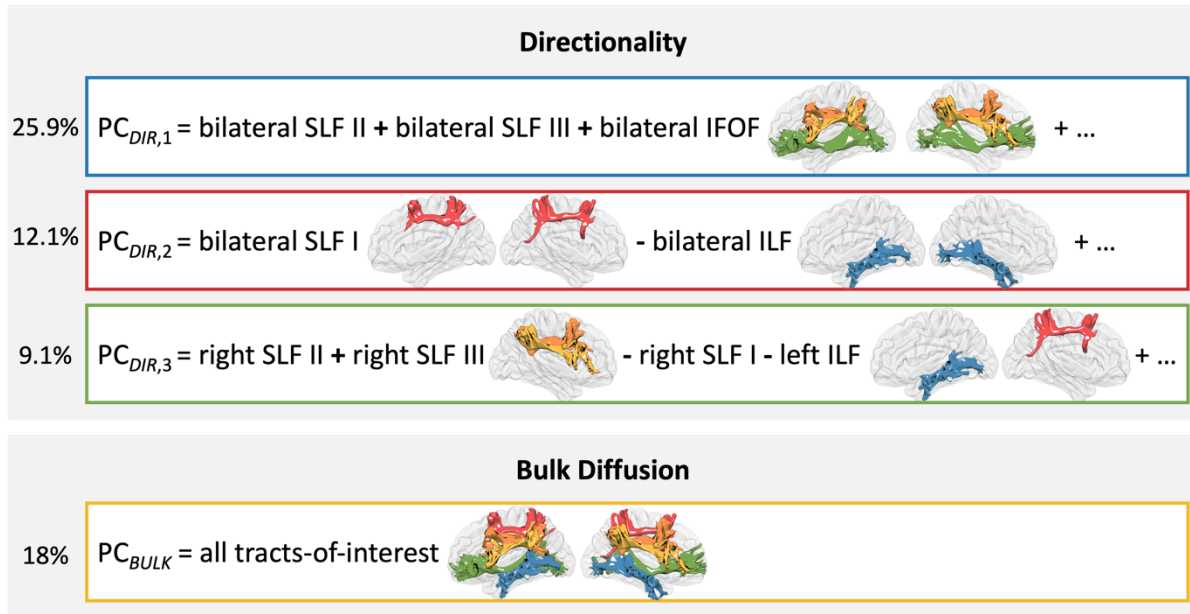

3  
4 **Figure 5.** Loading Profile of the Four Extracted Components. Percentages on the left denote  
5 the proportion of variance in the whole tractography dataset explained by each principal  
6 component. *Abbreviations:* SLF, superior longitudinal fasciculus; IFOF, inferior frontal-  
7 occipital fasciculus; ILF, inferior longitudinal fasciculus.

### 8 3.3. Associations between Structural Components and Behavioural Performance

9 The model comparison and selection processes for all dependent variables are  
10 summarized in Tables S2-S4. The best-fitting model of response precision showed that  
11  $PC_{BULK}$  correlated positively with  $\sigma_{VM}$  indicating that higher bulk diffusion across all TOIs  
12 was associated with lower response precision (Fig. 6a; Table 1). No significant interaction  
13 between task and  $PC_{BULK}$  was found, suggesting that the relationship between  $\sigma_{VM}$  and  
14  $PC_{BULK}$  was similarly strong across the location and orientation tasks. In addition, there was a  
15 statistically significant interaction between  $PC_{DIR,1}$  and  $PC_{DIR,3}$  (Fig. 6b; Table 1). This  
16 interaction was followed up by using the simple slope analysis with  $PC_{DIR,1}$  as the main  
17 predictor and  $PC_{DIR,3}$  as a moderator variable. The analysis showed that lower scores in  
18  $PC_{DIR,1}$  were related to lower  $\sigma_{VM}$  across tasks when  $PC_{DIR,3}$  scores were high ( $p = 0.003$ ).  
19 When scores of  $PC_{DIR,3}$  were low, however, there was no statistically significant association  
20 between  $PC_{DIR,1}$  and  $\sigma_{VM}$  ( $p = 0.300$ ). A *post hoc* model that included a three-way interaction  
21 between  $PC_{DIR,1}$ ,  $PC_{DIR,3}$ , and task did not significantly improve the model fit, suggesting that  
22 the interaction between  $PC_{DIR,1}$  and  $PC_{DIR,3}$  did not differ between the location and orientation  
23 tasks (Tables S5-S6).

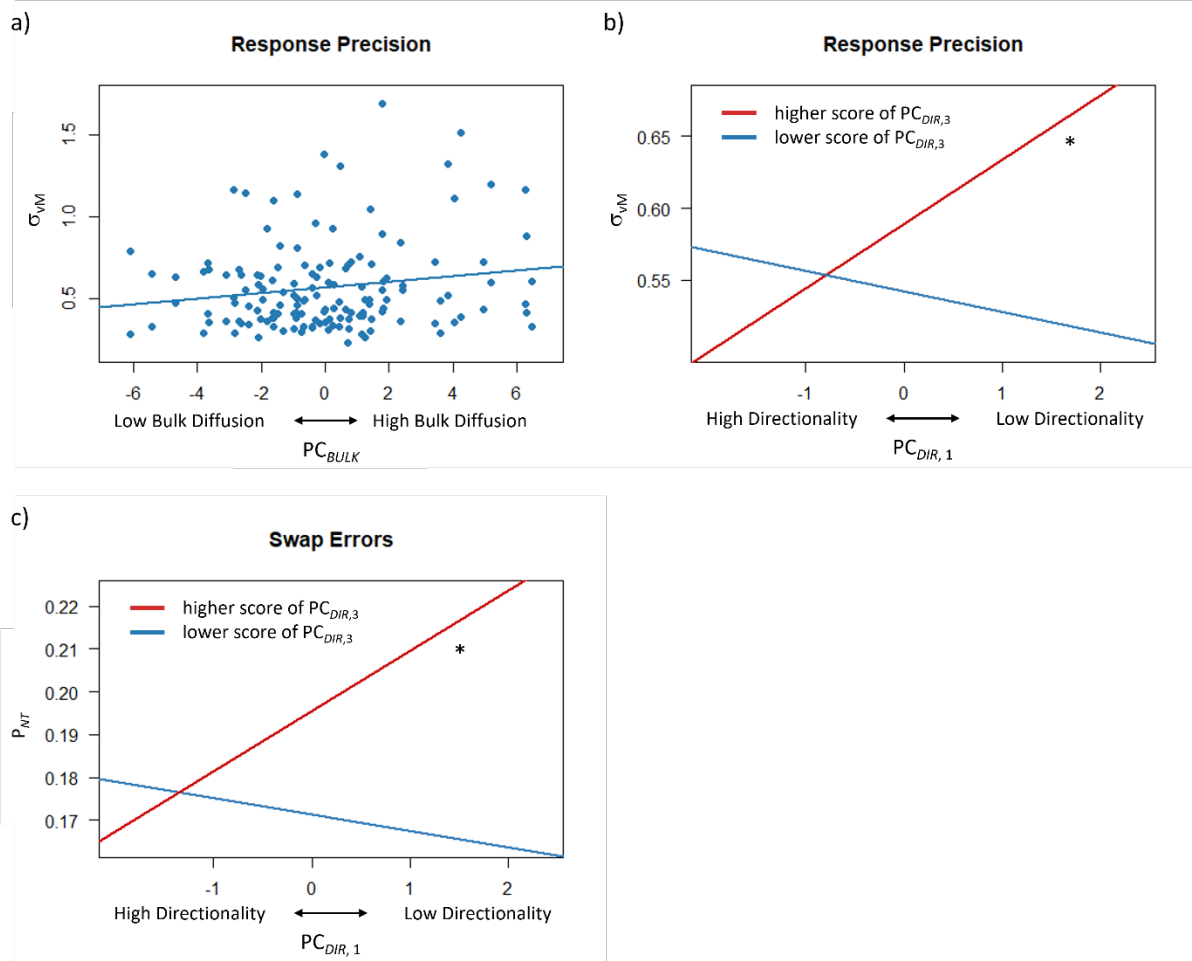

1

2 **Figure 6.** Brain-behaviour Associations Revealed by Linear Mixed Models. In the best-  
 3 fitting model of response precision, a) significant effects of  $PC_{BULK}$  and b) significant  
 4 interaction between  $PC_{DIR,1}$  and  $PC_{DIR,3}$  were found. Note that higher values in  $\sigma_{VM}$  represent  
 5 lower response precision. Higher values in  $PC_{DIR,1}$  and  $PC_{DIR,3}$  relate to lower extent of  
 6 diffusion directionality. In the best-fitting model of swap errors, c) significant interaction  
 7 between  $PC_{DIR,1}$  and  $PC_{DIR,3}$  was found. Asterisks in plots b) and c) denote significant simple  
 8 effects.

9 **Table 1.** The Best-fitting Model of Response Precision.

| Fixed Effects                  | Estimate | SE   | <i>t</i> | 95% CI         | <i>p</i> |
|--------------------------------|----------|------|----------|----------------|----------|
| Intercept (Orientation)        | -0.74    | 0.02 | 30.49    | [0.69, 0.78]   | < 0.001  |
| Task (Location)                | -0.34    | 0.03 | -10.41   | [-0.41, -0.28] | < 0.001  |
| $PC_{BULK}$                    | 0.02     | 0.01 | 2.25     | [0.00, 0.03]   | 0.028    |
| $PC_{DIR,1}$                   | 0.02     | 0.01 | 1.50     | [0.00, 0.03]   | 0.138    |
| $PC_{DIR,3}$                   | 0.02     | 0.02 | 1.30     | [-0.01, 0.05]  | 0.200    |
| $PC_{DIR,1} \times PC_{DIR,3}$ | 0.03     | 0.01 | 3.02     | [0.01, 0.04]   | 0.004    |

10

11 The best-fitting model of random guess rates, by contrast, did not show any  
 12 significant effect of the structural components (all *ps* >> 0.05), suggesting that the brain-  
 13 behaviour associations we observed are functionally specific to the precision of visual  
 14 working memory independently of random guessing.

1 The best-fitting model of swap errors revealed a statistically significant interaction  
2 between  $PC_{DIR,1}$  and  $PC_{DIR,3}$  (Fig. 6c; Table 2). The interaction was followed up in the same  
3 way as in the model of response precision to investigate the relationship between  $PC_{DIR,1}$  and  
4 swap errors at high and low levels of  $PC_{DIR,3}$ . The analysis showed that lower scores in  
5  $PC_{DIR,1}$  were related to lower probability of swap errors when scores of  $PC_{DIR,3}$  were higher ( $p$   
6 = 0.011). When scores of  $PC_{DIR,3}$  were lower, there was no association between  $PC_{DIR,1}$  and  
7 swap errors ( $p = 0.440$ ). A *post hoc* model that included a three-way interaction between  
8  $PC_{DIR,1}$ ,  $PC_{DIR,3}$ , and task did not significantly improve the model fit (Tables S7-S8).

9 **Table 2.** The Best-fitting Model of Swap Errors.

| Fixed Effects                  | Estimate | SE     | $t$   | 95% CI       | $p$     |
|--------------------------------|----------|--------|-------|--------------|---------|
| Intercept (Orientation)        | 0.03     | 0.01   | 3.31  | [0.01, 0.05] | 0.001   |
| Task (Location)                | 0.31     | 0.01   | 28.06 | [0.29, 0.33] | < 0.001 |
| $PC_{DIR,1}$                   | 0.01     | < 0.01 | 1.42  | [0.00, 0.01] | 0.162   |
| $PC_{DIR,3}$                   | 0.01     | 0.01   | 1.77  | [0.00, 0.02] | 0.082   |
| $PC_{DIR,1} \times PC_{DIR,3}$ | 0.01     | < 0.01 | 2.44  | [0.00, 0.01] | 0.018   |

10

#### 11 **4. Discussion**

12 The principal aim of the current study was to characterise the relationship between  
13 distinct aspects of visual working memory performance and the microstructure of major  
14 white matter tracts in the healthy adult brain. We found that components of tract-specific  
15 microstructural properties were associated with the precision of visual working memory but  
16 not with occasional random guesses made by participants during the tasks. Higher response  
17 precision was associated with lower bulk diffusion shared across all reconstructed tracts.  
18 Higher response precision, as well as lower swap errors, were associated with higher  
19 directionality in a set of bilateral frontoparietal-occipital tracts in individuals with decreased  
20 directionality in particular right frontoparietal tracts.

21 In the best-fitting model of response precision, we found that lower scores on  $PC_{BULK}$ ,  
22 most likely reflecting lower bulk diffusion across white matter tracts, were associated with  
23 higher precision in both the location and orientation tasks. It is noteworthy that the models of  
24 swap errors and random guess rates, by contrast, showed no effect of  $PC_{BULK}$ , suggesting that  
25 the general bulk diffusion of white matter tracts specifically mediates the precision of visual  
26 working memory and not task-irrelevant factors such as attention lapses. A previous study in  
27 children has shown that higher capacity in visual working memory task was associated with  
28 decreased MD in the IFOF and ILF (Krogsrud et al., 2018). A recent study in older adults



1 identified a negative association between global MD of whole-brain white matter and the  
2 sensitivity index in visual working memory task (Conley et al., 2020). Our findings go  
3 beyond this work by showing a specific relationship between general bulk diffusion and  
4 precision of memory representations rather than merely the overall capacity or accuracy of  
5 working memory. This finding also suggests that the precision of working memory  
6 representations may rely on a general, trait-like property of white matter tracts that is  
7 reflected by individual differences in bulk diffusion. Axon density, for example, is one  
8 possible candidate. This property, being negatively related to MD, determines how much  
9 information can be carried by the white matter tract (Alexander et al., 2007; Alexander et al.,  
10 2019; Beaulieu, 2002). Increases in axon density in young adulthood across all major  
11 pathways and global white matter are much slower than those in childhood and adolescence  
12 (Chang et al., 2015). Axon density may therefore serve as a relatively static, trait-like  
13 property in our sample by imposing resource limitations on visual working memory. In this  
14 case, our findings suggest that people with higher axonal density have more precise responses  
15 when reproducing features from visual working memory. It should be noted, however, that  
16 the measure of bulk diffusion/MD is also sensitive to other microstructural attributes such as  
17 axonal diameter and membrane permeability (Jones et al., 2013). Future research could  
18 extend our work using more sophisticated DWI models such as the neurite orientation  
19 dispersion and density imaging (NODDI) model (Zhang et al., 2012).

20 The model of response precision also showed a significant interaction between  $PC_{DIR,1}$   
21 and  $PC_{DIR,3}$ . Higher scores on these components describe a lower extent of directional  
22 diffusion along the axonal fibres, which is generally found in white matter tracts that are less  
23 myelinated or less coherently packed (Alexander et al., 2007; Beaulieu, 2002; Jones et al.,  
24 2013). Critically, both components were related to some but not all TOIs in our study, which  
25 suggests the presence of shared microstructural properties in specific groups of tracts.  $PC_{DIR,1}$   
26 represents directionality in a set of bilateral frontoparietal-occipital tracts (i.e., SLF II, SLF  
27 III, and IFOF in both hemispheres). Two of these tracts (i.e., the right SLF II and right SLF  
28 III) also contributed substantially to  $PC_{DIR,3}$ . We found that higher directionality in the  
29 frontoparietal-occipital tracts was associated with higher memory precision in both location  
30 and orientation tasks in individuals with decreased directionality in the right SLF II and right  
31 SLF III. Previous studies have shown that increased FA in the SLF and IFOF was associated  
32 with better performance in visual working memory tasks (Darki & Klingberg, 2015; Peters et  
33 al., 2014; Vestergaard et al., 2011; Walsh et al., 2011). Our result further extends the previous

1 findings by showing a specific relationship between diffusion directionality and the precision  
2 of visual working memory, independently of occasional random guesses originating from  
3 task-irrelevant factors. The interaction effect between  $PC_{DIR,1}$  and  $PC_{DIR,3}$  also reveals the  
4 interdependence of different sets of white matter tracts when predicting response precision in  
5 visual working memory tasks. This observation suggests that individual differences in  
6 working memory precision are modulated by the complex interplay between subsets of tracts  
7 across a wider working memory network.

8         The interaction between  $PC_{DIR,1}$  and  $PC_{DIR,3}$  was also associated with swap errors.  
9 Higher directionality in the frontoparietal-occipital tracts predicted lower swap errors across  
10 tasks in individuals with relatively low directionality in the right SLF II/III. The estimate of  
11 swap errors reflects a specific anomaly in feature binding between the probed and reported  
12 features (Schneegans & Bays, 2017). Previous studies of visual working memory have  
13 implicated the superior parietal area, inferior intraparietal sulcus, and lateral occipital regions  
14 in feature binding (Parra et al., 2014; Shafritz et al., 2002; Xu & Chun, 2006). White matter  
15 microstructure in the inferior frontal cortex has also been associated with feature binding  
16 performance (Parra et al., 2015). Binding deficits have been selectively associated with  
17 lesions in the left somatosensory cortex (Lugtmeijer et al., 2021). Our results further extend  
18 previous work by showing that binding errors that occur during visual working memory tasks  
19 are modulated by the microstructure of long-range white matter tracts that connect the frontal,  
20 parietal, and occipital regions.

21         The fact that we observed a significant interaction between  $PC_{DIR,1}$  and  $PC_{DIR,3}$  when  
22 modelling both response precision and swap errors implies common neural substrates for  
23 these distinct components of visual working memory performance. A recent study suggests  
24 that both response variability and swap errors are caused by stochastic noise in neural activity  
25 (Schneegans & Bays, 2017), for example, variability in neural spike timing (Faisal et al.,  
26 2008). Although the presence of noise is universal in the nervous system, some individuals  
27 may benefit from a relatively high signal-to-noise ratio, which can be modulated by, for  
28 example, the level of axonal myelination. When compared with unmyelinated axons, those  
29 insulated by myelin sheaths can modulate the speed of impulse conduction and thereby  
30 facilitate optimal synchronization among neural assemblies in distant regions (Fields &  
31 Bukalo, 2020; Nunez et al., 2015; Pajevic et al., 2014). Individuals with more myelinated  
32 axons in general may have more fine-grained modulation on conduction speed, which in turn  
33 allows a wider spectrum of synchronized oscillations. Since long-range, inter-areal

1 synchronization during visual working memory tasks has been found for a wide range of  
2 frequency bands (Daume et al., 2017; Palva et al., 2010; Sato et al., 2018), greater  
3 myelination might therefore contribute to more precise responses and lower swap errors by  
4 boosting signal resolution.

5 One other interesting observation of the interaction effects is that people with lower  
6 scores on  $PC_{DIR,3}$  tended to have overall higher response precision and lower swap errors  
7 (Fig. 6b-c, blue lines). Such good performance was not related to scores on  $PC_{DIR,1}$ , which  
8 suggests that higher directionality along the right SLF II and SLF III operates as a protective  
9 factor, shielding visual working memory from effects arising in the set of bilateral  
10 frontoparietal-occipital tracts. When such protection is weak, that is, when microstructure of  
11 the right SLF II/III is somehow suboptimal, individual differences in task performance were  
12 found to covary strongly with differences in directionality in the bilateral frontoparietal-  
13 occipital network. The strong reliance on long-range white matter tracts across a large  
14 bilateral network may impose a higher degree of susceptibility to disturbance in visual  
15 working memory perhaps due to focal lesions in white matter arising from neurological  
16 diseases. To speculate more broadly, our findings also suggest that swap errors occur, at least  
17 in a significant portion of trials, when the precision of the maintained representation is low,  
18 which in turn increases confusability between different features stored in visual working  
19 memory. This claim is consistent with previous finding that elevated swap errors were  
20 observed when the target item was more similar to the non-target distractors (Schneegans &  
21 Bays, 2017).

22 The observed effect of  $PC_{BULK}$  and the interaction between  $PC_{DIR,1}$  and  $PC_{DIR,3}$  did not  
23 show any notable differences between the location and orientation tasks, even though we  
24 observed robust differences between tasks when we analysed behavioural data only. In  
25 addition, our study comprised a relatively large sample, suggesting that we should have been  
26 able to detect even small differences between tasks in brain-behaviour relationship should  
27 these differences exist. The location and orientation tasks in our study involved a common  
28 encoding display but in which participants were instructed to reproduce either the spatial or  
29 non-spatial features. Previous studies using EEG recording have shown that the contralateral  
30 delay activity (CDA) tracks different features stored in visual working memory. When  
31 participants were presented with an identical array of items, greater CDA was found when  
32 participants were tested on the orientations or shapes of the items, compared with when they  
33 were tested on the colours of the items (Luria et al., 2010; Woodman & Vogel, 2008). This

1 feature-specific difference, however, was not apparent in the microstructural properties in  
2 long-range white matter tracts in our study. Recent studies have argued that human cognition  
3 arises from dynamic interactions within and between large-scale networks rather than coming  
4 from several discrete, specialised brain regions (Bassett & Sporns, 2017; Bressler & Menon,  
5 2010; Park & Friston, 2013). Anatomical connections between different brain areas,  
6 comprising relatively invariant white matter fibres, predict but do not fully determine the  
7 dynamic repertoire of cognitive functions (Honey et al., 2009; Suarez et al., 2020). The  
8 functional differences between the location and orientation tasks may therefore arise from  
9 neural mechanisms that are not constrained by or sensitive to white matter microstructure.

10 In this study, we applied a two-step PCA to the tractography data which extracted  
11 four orthogonal PCs that encompassed critical information in both the measure and tract  
12 spaces. This approach addressed problems that were overlooked in previous studies  
13 investigating the relationship between visual working memory and white matter tracts. For  
14 example, Krogsrud and colleagues (2018) failed to find associations between visual working  
15 memory performance and the tract-based FA measures after correcting for multiple  
16 comparisons. The fact that Krogsrud et al.'s study did not replicate otherwise reproducible  
17 findings (e.g., Darki & Klingberg, 2015; Nagy et al., 2004; Peters et al., 2014; Vestergaard et  
18 al., 2011; Walsh et al., 2011), raises an issue of high dimensionality in the predictor space.  
19 The use of PCA in our study helped achieve data reduction while maintaining maximal  
20 information in the tractography dataset. In addition, although all studies have made claims  
21 that certain tracts are related to visual working memory, few studies have controlled for the  
22 general effect of individual differences in white matter microstructure (Krogsrud et al., 2018;  
23 Vestergaard et al., 2011; Walsh et al., 2011), leading to inconclusive results regarding tract  
24 specificity. The “global” microstructure can explain up to 73% of the variance and therefore  
25 become non-negligible in some datasets (Clayden et al., 2012; Johnson et al., 2015; Penke et  
26 al., 2010). The application of tract-space PCA effectively identified the global microstructural  
27 component ( $PC_{BULK}$ ) in our dataset, which helped find effects that are above and beyond the  
28 general differences in bulk diffusion. To summarize, the two-step PCA approach in our study  
29 highlights the fact that the modulating influence of white matter microstructure goes beyond  
30 the level of individual metrics or tracts.

## 31 **5. Conclusions**

1            In the present study, we observed brain-behaviour associations between visual  
2 working memory and white matter microstructure that were functionally specific to the  
3 precision of representations in visual working memory, both spatial and non-spatial. Higher  
4 response precision was associated with lower bulk diffusion across all reconstructed white  
5 matter tracts. Response precision was also positively related to diffusion directionality in a  
6 particular group of bilateral frontoparietal-occipital pathways, but these associations  
7 depended on microstructural properties of another group of tracts. Our findings suggest that  
8 individual differences in the precision of visual working memory reflect inter-subject  
9 variability in both widespread and regional properties of white matter microstructure, which  
10 in turn show evidence of interaction effects across the wider working memory network.

## 1 **Acknowledgements**

2 The authors would like to thank Dr David Lloyd from the University of Queensland for his  
3 assistance with the experimental set-up.

## 4 **CRediT Author Statement**

5 **Xuqian Li:** Conceptualization, Methodology, Software, Investigation, Writing - Original  
6 Draft, Writing - Review & Editing, Visualization; **Dragan Rangelov:** Conceptualization,  
7 Methodology, Software, Writing - Review & Editing; Supervision; **Jason B.**  
8 **Mattingley:** Conceptualization, Methodology, Writing - Review & Editing, Supervision;  
9 **Lena Oestreich:** Methodology, Writing - Review & Editing; **Delphine Lévy-**  
10 **Bencheton:** Conceptualization, Methodology, Investigation; **Michael J.**  
11 **O'Sullivan:** Conceptualization, Methodology, Writing - Review & Editing, Supervision.

## 12 **Funding Sources**

13 XL was supported by a scholarship from the Graduate School for Research Training, The  
14 University of Queensland. DR was supported by a National Health and Medical Research  
15 Council (Australia) Ideas grant (APP1186955). MOS was supported by a strategic award  
16 from the Deputy Vice-Chancellor for Research and Innovation, The University of  
17 Queensland. JBM was supported by a National Health and Medical Research Council  
18 (Australia) Investigator Grant (GNT2010141).

## 19 **Data Availability Statement**

20 Data used in this study are available for download from the OSF repository  
21 ([https://osf.io/4wkuf/?view\\_only=9ccba5df6110466590077ea615614f4f](https://osf.io/4wkuf/?view_only=9ccba5df6110466590077ea615614f4f)).

## 22 **Conflict of Interest**

23 The authors declare that there is no conflict of interests.

## 1 **Figure Captions**

2 **Figure 1.** Schematic Illustration of the Location and Orientation Tasks. At the start of each  
3 block, an instruction message appeared to indicate the subsequent task. At the beginning of  
4 each run, a message appeared on a black background to remind participants to encode items  
5 presented on either the left side or right side. In each trial, six gratings were presented during  
6 the encoding period. After a 900 ms delay period, participants provided a response based on  
7 the probe information.

8 **Figure 2.** Probabilistic Tractography of Five Tracts of Interest in Both Hemispheres.  
9 Normalised streamline density maps from a representative participant were converted to 3D  
10 meshes for the purpose of visualization. *Abbreviations:* SLF, superior longitudinal fasciculus;  
11 IFOF, inferior frontal-occipital fasciculus; ILF, inferior longitudinal fasciculus.

12 **Figure 3.** Schematic Illustration of Two-step Principal Component Analysis (PCA). The  
13 measure space PCA aimed to capture covariations across different diffusion metrics with  
14 participant and tract data as observations. Scores of the extracted components were then re-  
15 structured for the tract space PCA which captured covariations across white matter tracts.

16 **Figure 4.** Distributions of Response Errors in Visual Working Memory Tasks. Results of the  
17 a) location task and b) orientation task are shown. Proportion of trials within each bin is  
18 averaged across participants. Error bars in each bin denote standard errors of the mean.

19 **Figure 5.** Loading Profile of the Four Extracted Components. Percentages on the left denote  
20 the proportion of variance in the whole tractography dataset explained by each principal  
21 component. *Abbreviations:* SLF, superior longitudinal fasciculus; IFOF, inferior frontal-  
22 occipital fasciculus; ILF, inferior longitudinal fasciculus.

23 **Figure 6.** Brain-behaviour Associations Revealed by Linear Mixed Models. In the best-  
24 fitting model of response precision, a) significant effect of  $PC_{BULK}$  and b) significant  
25 interaction between  $PC_{DIR,1}$  and  $PC_{DIR,3}$  were found. Note that higher values in  $\sigma_{VM}$  represent  
26 lower response precision. Higher values in  $PC_{DIR,1}$  and  $PC_{DIR,3}$  relate to lower extent of  
27 diffusion directionality. In the best-fitting model of swap errors, c) significant interaction  
28 between  $PC_{DIR,1}$  and  $PC_{DIR,3}$  was found. Asterisks in plots b) and c) denote significant simple  
29 effects.

## References

- 1 Alexander, A. L., Lee, J. E., Lazar, M., & Field, A. S. (2007). Diffusion tensor imaging of the  
2 brain. *Neurotherapeutics*, 4(3), 316-329. <https://doi.org/10.1016/j.nurt.2007.05.011>
- 3 Alexander, D. C., Dyrby, T. B., Nilsson, M., & Zhang, H. (2019). Imaging brain  
4 microstructure with diffusion MRI: practicality and applications. *NMR Biomed*, 32(4),  
5 e3841. <https://doi.org/10.1002/nbm.3841>
- 6 Andersson, J. L. R., & Sotiropoulos, S. N. (2016). An integrated approach to correction for  
7 off-resonance effects and subject movement in diffusion MR imaging. *Neuroimage*,  
8 125, 1063-1078. <https://doi.org/10.1016/j.neuroimage.2015.10.019>
- 9 Awh, E., & Jonides, J. (2001). Overlapping mechanisms of attention and spatial working  
10 memory. *Trends in Cognitive Sciences*, 5(3), 119-126.  
11 [https://doi.org/https://doi.org/10.1016/S1364-6613\(00\)01593-X](https://doi.org/https://doi.org/10.1016/S1364-6613(00)01593-X)
- 12 Bartlett, M. S. (1951). A FURTHER NOTE ON TESTS OF SIGNIFICANCE IN FACTOR  
13 ANALYSIS [<https://doi.org/10.1111/j.2044-8317.1951.tb00299.x>]. *British Journal of*  
14 *Statistical Psychology*, 4(1), 1-2. <https://doi.org/https://doi.org/10.1111/j.2044->  
15 [8317.1951.tb00299.x](https://doi.org/https://doi.org/10.1111/j.2044-8317.1951.tb00299.x)
- 16 Bassett, D. S., & Sporns, O. (2017). Network neuroscience. *Nature Neuroscience*, 20(3), 353-  
17 364. <https://doi.org/10.1038/nn.4502>
- 18 Bates, D., Machler, M., Bolker, B. M., & Walker, S. C. (2015). Fitting Linear Mixed-Effects  
19 Models Using lme4. *Journal of Statistical Software*, 67(1), 1-48. <https://doi.org/DOI>  
20 [10.18637/jss.v067.i01](https://doi.org/10.18637/jss.v067.i01)
- 21 Bays, P. M. (2016). Evaluating and excluding swap errors in analogue tests of working  
22 memory. *Sci Rep*, 6, 19203. <https://doi.org/10.1038/srep19203>
- 23 Bays, P. M., Catalao, R. F., & Husain, M. (2009). The precision of visual working memory is  
24 set by allocation of a shared resource. *J Vis*, 9(10), 7 1-11.  
25 <https://doi.org/10.1167/9.10.7>
- 26 Bays, P. M., Gorgoraptis, N., Wee, N., Marshall, L., & Husain, M. (2011). Temporal  
27 dynamics of encoding, storage, and reallocation of visual working memory. *J Vis*,  
28 11(10). <https://doi.org/10.1167/11.10.6>
- 29 Bays, P. M., Wu, E. Y., & Husain, M. (2011). Storage and binding of object features in visual  
30 working memory. *Neuropsychologia*, 49(6), 1622-1631.  
31 <https://doi.org/10.1016/j.neuropsychologia.2010.12.023>
- 32 Beaulieu, C. (2002). The basis of anisotropic water diffusion in the nervous system - a  
33 technical review. *NMR Biomed*, 15(7-8), 435-455. <https://doi.org/10.1002/nbm.782>
- 34 Behrens, T. E., Berg, H. J., Jbabdi, S., Rushworth, M. F., & Woolrich, M. W. (2007).  
35 Probabilistic diffusion tractography with multiple fibre orientations: What can we  
36 gain? *Neuroimage*, 34(1), 144-155. <https://doi.org/10.1016/j.neuroimage.2006.09.018>
- 37 Behrens, T. E., Woolrich, M. W., Jenkinson, M., Johansen-Berg, H., Nunes, R. G., Clare, S.,  
38 Matthews, P. M., Brady, J. M., & Smith, S. M. (2003). Characterization and  
39 propagation of uncertainty in diffusion-weighted MR imaging. *Magn Reson Med*,  
40 50(5), 1077-1088. <https://doi.org/10.1002/mrm.10609>
- 41 Brainard, D. H. (1997). The Psychophysics Toolbox. *Spatial Vision*, 10(4), 433-436.  
42 <https://doi.org/10.1163/156856897X00357>
- 43 Bressler, S. L., & Menon, V. (2010). Large-scale brain networks in cognition: emerging  
44 methods and principles. *Trends in Cognitive Sciences*, 14(6), 277-290.  
45 <https://doi.org/https://doi.org/10.1016/j.tics.2010.04.004>
- 46 Cattell, R. B. (1966). The Scree Test For The Number Of Factors. *Multivariate Behav Res*,  
47 1(2), 245-276. [https://doi.org/10.1207/s15327906mbr0102\\_10](https://doi.org/10.1207/s15327906mbr0102_10)



- 1 Chang, Y. S., Owen, J. P., Pojman, N. J., Thieu, T., Bukshpun, P., Wakahiro, M. L., Berman,  
2 J. I., Roberts, T. P., Nagarajan, S. S., Sherr, E. H., & Mukherjee, P. (2015). White  
3 Matter Changes of Neurite Density and Fiber Orientation Dispersion during Human  
4 Brain Maturation. *PLoS One*, *10*(6), e0123656.  
5 <https://doi.org/10.1371/journal.pone.0123656>
- 6 Clayden, J. D., Jentschke, S., Munoz, M., Cooper, J. M., Chadwick, M. J., Banks, T., Clark,  
7 C. A., & Vargha-Khadem, F. (2012). Normative development of white matter tracts:  
8 similarities and differences in relation to age, gender, and intelligence. *Cereb Cortex*,  
9 *22*(8), 1738-1747. <https://doi.org/10.1093/cercor/bhr243>
- 10 Conley, A. C., Karayanidis, F., Jolly, T. A. D., Yang, M. H., & Hsieh, S. (2020). Cerebral  
11 Arterial Pulsatility and Global White Matter Microstructure Impact Spatial Working  
12 Memory in Older Adults With and Without Cardiovascular Risk Factors. *Front Aging*  
13 *Neurosci*, *12*, 245. <https://doi.org/10.3389/fnagi.2020.00245>
- 14 Cordero-Grande, L., Christiaens, D., Hutter, J., Price, A. N., & Hajnal, J. V. (2019). Complex  
15 diffusion-weighted image estimation via matrix recovery under general noise models.  
16 *Neuroimage*, *200*, 391-404. <https://doi.org/10.1016/j.neuroimage.2019.06.039>
- 17 Dagenbach, D. (2019). Chapter 2 - Insights into cognition from network science analyses of  
18 human brain functional connectivity: Working memory as a test case. In B. C.  
19 Munsell, G. Wu, L. Bonilha, & P. J. Laurienti (Eds.), *Connectomics* (pp. 27-41).  
20 Academic Press. <https://doi.org/https://doi.org/10.1016/B978-0-12-813838-0.00002-9>
- 21 Daniel, T. A., Katz, J. S., & Robinson, J. L. (2016). Delayed match-to-sample in working  
22 memory: A BrainMap meta-analysis. *Biol Psychol*, *120*, 10-20.  
23 <https://doi.org/10.1016/j.biopsycho.2016.07.015>
- 24 Darki, F., & Klingberg, T. (2015). The Role of Fronto-Parietal and Fronto-Striatal Networks  
25 in the Development of Working Memory: A Longitudinal Study. *Cerebral Cortex*,  
26 *25*(6), 1587-1595. <https://doi.org/10.1093/cercor/bht352>
- 27 Daume, J., Gruber, T., Engel, A. K., & Fries, U. (2017). Phase-Amplitude Coupling and  
28 Long-Range Phase Synchronization Reveal Frontotemporal Interactions during Visual  
29 Working Memory. *Journal of Neuroscience*, *37*(2), 313-322.  
30 <https://doi.org/10.1523/JNEUROSCI.2130-16.2016>
- 31 de Fockert, J. W., Rees, G., Frith, C. D., & Lavie, N. (2001). The Role of Working Memory  
32 in Visual Selective Attention. *Science*, *291*(5509), 1803.  
33 <https://doi.org/10.1126/science.1056496>
- 34 de Groot, M., Vernooij, M. W., Klein, S., Ikram, M. A., Vos, F. M., Smith, S. M., Niessen,  
35 W. J., & Andersson, J. L. (2013). Improving alignment in Tract-based spatial  
36 statistics: evaluation and optimization of image registration. *Neuroimage*, *76*, 400-  
37 411. <https://doi.org/10.1016/j.neuroimage.2013.03.015>
- 38 Düzel, E., Penny, W. D., & Burgess, N. (2010). Brain oscillations and memory. *Current*  
39 *Opinion in Neurobiology*, *20*(2), 143-149.  
40 <https://doi.org/https://doi.org/10.1016/j.conb.2010.01.004>
- 41 Dziuban, C. D., & Shirkey, E. C. (1974). When Is a Correlation Matrix Appropriate for  
42 Factor-Analysis - Decision Rules. *Psychological Bulletin*, *81*(6), 358-361.  
43 <https://doi.org/DOI 10.1037/h0036316>
- 44 Emrich, S. M., Riggall, A. C., Larocque, J. J., & Postle, B. R. (2013). Distributed patterns of  
45 activity in sensory cortex reflect the precision of multiple items maintained in visual  
46 short-term memory. *Journal of Neuroscience*, *33*(15), 6516-6523.  
47 <https://doi.org/10.1523/JNEUROSCI.5732-12.2013>
- 48 Faisal, A. A., Selen, L. P., & Wolpert, D. M. (2008). Noise in the nervous system. *Nature*  
49 *Reviews Neuroscience*, *9*(4), 292-303. <https://doi.org/10.1038/nrn2258>

- 1 Fields, R. D., & Bukalo, O. (2020). Myelin makes memories. *Nature Neuroscience*, 23(4),  
2 469-470. <https://doi.org/10.1038/s41593-020-0606-x>
- 3 Fisher, N. I. (1995). *Statistical analysis of circular data*. Cambridge University Press.
- 4 Forkel, S. J., Thiebaut de Schotten, M., Kawadler, J. M., Dell'Acqua, F., Danek, A., &  
5 Catani, M. (2014). The anatomy of fronto-occipital connections from early blunt  
6 dissections to contemporary tractography. *Cortex*, 56, 73-84.  
7 <https://doi.org/10.1016/j.cortex.2012.09.005>
- 8 Gathercole, S. E., Pickering, S. J., Knight, C., & Stegmann, Z. (2004). Working memory  
9 skills and educational attainment: evidence from national curriculum assessments at 7  
10 and 14 years of age. *Applied Cognitive Psychology*, 18(1), 1-16.  
11 <https://doi.org/10.1002/acp.934>
- 12 Gorgoraptis, N., Catalao, R. F., Bays, P. M., & Husain, M. (2011). Dynamic updating of  
13 working memory resources for visual objects. *Journal of Neuroscience*, 31(23), 8502-  
14 8511. <https://doi.org/10.1523/JNEUROSCI.0208-11.2011>
- 15 Henderson, S. E., Vallejo, A. I., Ely, B. A., Kang, G., Krain Roy, A., Pine, D. S., Stern, E. R.,  
16 & Gabbay, V. (2014). The neural correlates of emotional face-processing in  
17 adolescent depression: a dimensional approach focusing on anhedonia and illness  
18 severity. *Psychiatry Research: Neuroimaging*, 224(3), 234-241.  
19 <https://doi.org/10.1016/j.psychres.2014.09.006>
- 20 Herbet, G., Zemmoura, I., & Duffau, H. (2018). Functional Anatomy of the Inferior  
21 Longitudinal Fasciculus: From Historical Reports to Current Hypotheses. *Front*  
22 *Neuroanat*, 12, 77. <https://doi.org/10.3389/fnana.2018.00077>
- 23 Honey, C. J., Sporns, O., Cammoun, L., Gigandet, X., Thiran, J. P., Meuli, R., & Hagmann,  
24 P. (2009). Predicting human resting-state functional connectivity from structural  
25 connectivity. *Proc Natl Acad Sci U S A*, 106(6), 2035-2040.  
26 <https://doi.org/10.1073/pnas.0811168106>
- 27 Hughes, J. (2021). *reghelper: Helper Functions for Regression Analysis*. In [https://CRAN.R-](https://CRAN.R-project.org/package=reghelper)  
28 [project.org/package=reghelper](https://CRAN.R-project.org/package=reghelper)
- 29 Isensee, J., & Hucho, T. (2019). High-Content Imaging of Immunofluorescently Labeled  
30 TRPV1-Positive Sensory Neurons. *Methods Mol Biol*, 1987, 111-124.  
31 [https://doi.org/10.1007/978-1-4939-9446-5\\_8](https://doi.org/10.1007/978-1-4939-9446-5_8)
- 32 Jbabdi, S., Sotiropoulos, S. N., Savio, A. M., Grana, M., & Behrens, T. E. (2012). Model-  
33 based analysis of multishell diffusion MR data for tractography: how to get over  
34 fitting problems. *Magn Reson Med*, 68(6), 1846-1855.  
35 <https://doi.org/10.1002/mrm.24204>
- 36 Jenkinson, M., Bannister, P., Brady, M., & Smith, S. (2002). Improved Optimization for the  
37 Robust and Accurate Linear Registration and Motion Correction of Brain Images.  
38 *Neuroimage*, 17(2), 825-841. <https://doi.org/https://doi.org/10.1006/nimg.2002.1132>
- 39 Johnson, M. A., Diaz, M. T., & Madden, D. J. (2015). Global versus tract-specific  
40 components of cerebral white matter integrity: relation to adult age and perceptual-  
41 motor speed. *Brain Struct Funct*, 220(5), 2705-2720. [https://doi.org/10.1007/s00429-](https://doi.org/10.1007/s00429-014-0822-9)  
42 [014-0822-9](https://doi.org/10.1007/s00429-014-0822-9)
- 43 Jones, D. K., Knosche, T. R., & Turner, R. (2013). White matter integrity, fiber count, and  
44 other fallacies: the do's and don'ts of diffusion MRI. *Neuroimage*, 73, 239-254.  
45 <https://doi.org/10.1016/j.neuroimage.2012.06.081>
- 46 Kaiser, H. F., & Rice, J. (1974). LITTLE JIFFY, MARK 4. *Educational and Psychological*  
47 *Measurement*, 34(1), 111-117. <https://doi.org/10.1177/001316447403400115>
- 48 Krogsrud, S., Fjell, A., Tamnes, C., Grydeland, H., Due-Tønnessen, P., Bjørnerud, A.,  
49 Sampaio-Baptista, C., Andersson, J., Johansen-Berg, H., & Walhovd, K. (2018).  
50 Development of white matter microstructure in relation to verbal and visuospatial

- 1 working memory—A longitudinal study. *PLoS One*, 13(4), e0195540.  
2 <https://doi.org/10.1371/journal.pone.0195540>
- 3 Kucheryayskiy, S. (2020). mdatools - R package for chemometrics. *Chemometrics and*  
4 *Intelligent Laboratory Systems*, 198. <https://doi.org/ARTN 103937>  
5 10.1016/j.chemolab.2020.103937
- 6 Kuznetsova, A., Brockhoff, P. B., & Christensen, R. H. B. (2017). lmerTest Package: Tests in  
7 Linear Mixed Effects Models. *Journal of Statistical Software*, 82(13), 1-26.  
8 <https://doi.org/DOI 10.18637/jss.v082.i13>
- 9 Lazar, M. (2017). Working Memory: How Important Is White Matter? *Neuroscientist*, 23(2),  
10 197-210. <https://doi.org/10.1177/1073858416634298>
- 11 Lugtmeijer, S., Schneegans, S., Lammers, N. A., Geerligs, L., de Leeuw, F. E., de Haan, E.  
12 H. F., Bays, P. M., & Kessels, R. P. C. (2021). Consequence of stroke for feature  
13 recall and binding in visual working memory. *Neurobiol Learn Mem*, 179, 107387.  
14 <https://doi.org/10.1016/j.nlm.2021.107387>
- 15 Luria, R., Sessa, P., Gotler, A., Jolicoeur, P., & Dell'Acqua, R. (2010). Visual short-term  
16 memory capacity for simple and complex objects. *J Cogn Neurosci*, 22(3), 496-512.  
17 <https://doi.org/10.1162/jocn.2009.21214>
- 18 Maier, M. J. (2015). *Companion Package to the Book "R: Einführung durch angewandte*  
19 *Statistik"*. In <http://CRAN.R-project.org/package=REdaS>
- 20 Makris, N., Kennedy, D. N., McInerney, S., Sorensen, A. G., Wang, R., Caviness, V. S., &  
21 Pandya, D. N. (2005). Segmentation of Subcomponents within the Superior  
22 Longitudinal Fascicle in Humans: A Quantitative, In Vivo , DT-MRI Study. *Cerebral*  
23 *Cortex*, 15(6), 854-869. <https://doi.org/10.1093/cercor/bhh186>
- 24 Marques, J. P., Kober, T., Krueger, G., van der Zwaag, W., Van de Moortele, P. F., &  
25 Gruetter, R. (2010). MP2RAGE, a self bias-field corrected sequence for improved  
26 segmentation and T1-mapping at high field. *Neuroimage*, 49(2), 1271-1281.  
27 <https://doi.org/10.1016/j.neuroimage.2009.10.002>
- 28 Massey, F. J. (1951). The Kolmogorov-Smirnov Test for Goodness of Fit. *Journal of the*  
29 *American Statistical Association*, 46(253), 68-78.  
30 <https://doi.org/10.1080/01621459.1951.10500769>
- 31 Nagy, Z., Westerberg, H., & Klingberg, T. (2004). Maturation of white matter is associated  
32 with the development of cognitive functions during childhood. *Journal of Cognitive*  
33 *Neuroscience*, 16(7), 1227-1233. <https://doi.org/Doi 10.1162/0898929041920441>
- 34 Nunez, P. L., Srinivasan, R., & Fields, R. D. (2015). EEG functional connectivity, axon  
35 delays and white matter disease. *Clin Neurophysiol*, 126(1), 110-120.  
36 <https://doi.org/10.1016/j.clinph.2014.04.003>
- 37 Owen, A. M., McMillan, K. M., Laird, A. R., & Bullmore, E. (2005). N-back working  
38 memory paradigm: a meta-analysis of normative functional neuroimaging studies.  
39 *Hum Brain Mapp*, 25(1), 46-59. <https://doi.org/10.1002/hbm.20131>
- 40 Pajevic, S., Basser, P. J., & Fields, R. D. (2014). Role of myelin plasticity in oscillations and  
41 synchrony of neuronal activity. *Neuroscience*, 276, 135-147.  
42 <https://doi.org/10.1016/j.neuroscience.2013.11.007>
- 43 Palva, J. M., Monto, S., Kulashekhar, S., & Palva, S. (2010). Neuronal synchrony reveals  
44 working memory networks and predicts individual memory capacity. *Proc Natl Acad*  
45 *Sci U S A*, 107(16), 7580-7585. <https://doi.org/10.1073/pnas.0913113107>
- 46 Park, H. J., & Friston, K. (2013). Structural and functional brain networks: from connections  
47 to cognition. *Science*, 342(6158), 1238411. <https://doi.org/10.1126/science.1238411>
- 48 Parlatini, V., Radua, J., Dell'Acqua, F., Leslie, A., Simmons, A., Murphy, D. G., Catani, M.,  
49 & Thiebaut de Schotten, M. (2017). Functional segregation and integration within

- 1 fronto-parietal networks. *Neuroimage*, 146, 367-375.  
2 <https://doi.org/10.1016/j.neuroimage.2016.08.031>
- 3 Parra, M. A., Della Sala, S., Logie, R. H., & Morcom, A. M. (2014). Neural correlates of  
4 shape-color binding in visual working memory. *Neuropsychologia*, 52, 27-36.  
5 <https://doi.org/10.1016/j.neuropsychologia.2013.09.036>
- 6 Parra, M. A., Saarimaki, H., Bastin, M. E., Londono, A. C., Pettit, L., Lopera, F., Della Sala,  
7 S., & Abrahams, S. (2015). Memory binding and white matter integrity in familial  
8 Alzheimer's disease. *Brain*, 138(Pt 5), 1355-1369.  
9 <https://doi.org/10.1093/brain/awv048>
- 10 Pasternak, O., Sochen, N., Gur, Y., Intrator, N., & Assaf, Y. (2009). Free water elimination  
11 and mapping from diffusion MRI. *Magn Reson Med*, 62(3), 717-730.  
12 <https://doi.org/10.1002/mrm.22055>
- 13 Pelli, D. G. (1997). The VideoToolbox software for visual psychophysics: transforming  
14 numbers into movies. *Spatial Vision*, 10(4), 437-442.  
15 <https://doi.org/10.1163/156856897X00366>
- 16 Penke, L., Munoz Maniega, S., Murray, C., Gow, A. J., Hernandez, M. C., Clayden, J. D.,  
17 Starr, J. M., Wardlaw, J. M., Bastin, M. E., & Deary, I. J. (2010). A general factor of  
18 brain white matter integrity predicts information processing speed in healthy older  
19 people. *Journal of Neuroscience*, 30(22), 7569-7574.  
20 <https://doi.org/10.1523/JNEUROSCI.1553-10.2010>
- 21 Peters, B. D., Ikuta, T., Derosse, P., John, M., Burdick, K. E., Gruner, P., Prendergast, D. M.,  
22 Szeszko, P. R., & Malhotra, A. K. (2014). Age-Related Differences in White Matter  
23 Tract Microstructure Are Associated with Cognitive Performance from Childhood to  
24 Adulthood. *Biological Psychiatry*, 75(3), 248-256.  
25 <https://doi.org/10.1016/j.biopsych.2013.05.020>
- 26 Pratte, M. S., Park, Y. E., Rademaker, R. L., & Tong, F. (2017). Accounting for stimulus-  
27 specific variation in precision reveals a discrete capacity limit in visual working  
28 memory. *J Exp Psychol Hum Percept Perform*, 43(1), 6-17.  
29 <https://doi.org/10.1037/xhp0000302>
- 30 Rottschy, C., Langner, R., Dogan, I., Reetz, K., Laird, A. R., Schulz, J. B., Fox, P. T., &  
31 Eickhoff, S. B. (2012). Modelling neural correlates of working memory: a coordinate-  
32 based meta-analysis. *Neuroimage*, 60(1), 830-846.  
33 <https://doi.org/10.1016/j.neuroimage.2011.11.050>
- 34 Sato, J., Mossad, S. I., Wong, S. M., Hunt, B. A. E., Dunkley, B. T., Smith, M. L., Urbain,  
35 C., & Taylor, M. J. (2018). Alpha keeps it together: Alpha oscillatory synchrony  
36 underlies working memory maintenance in young children. *Dev Cogn Neurosci*, 34,  
37 114-123. <https://doi.org/10.1016/j.dcn.2018.09.001>
- 38 Schneegans, S., & Bays, P. M. (2016). No fixed item limit in visuospatial working memory.  
39 *Cortex*, 83, 181-193. <https://doi.org/10.1016/j.cortex.2016.07.021>
- 40 Schneegans, S., & Bays, P. M. (2017). Neural Architecture for Feature Binding in Visual  
41 Working Memory. *Journal of Neuroscience*, 37(14), 3913-3925.  
42 <https://doi.org/10.1523/JNEUROSCI.3493-16.2017>
- 43 Shafritz, K. M., Gore, J. C., & Marois, R. (2002). The role of the parietal cortex in visual  
44 feature binding. *Proc Natl Acad Sci U S A*, 99(16), 10917-10922.  
45 <https://doi.org/10.1073/pnas.152694799>
- 46 Shinoura, N., Suzuki, Y., Tsukada, M., Katsuki, S., Yamada, R., Tabei, Y., Saito, K., & Yagi,  
47 K. (2007). Impairment of inferior longitudinal fasciculus plays a role in visual  
48 memory disturbance. *Neurocase*, 13(2), 127-130.  
49 <https://doi.org/10.1080/13554790701399254>

- 1 Smith, S. M. (2002). Fast robust automated brain extraction. *Hum Brain Mapp*, 17(3), 143-  
2 155. <https://doi.org/10.1002/hbm.10062>
- 3 Smith, S. M., Jenkinson, M., Woolrich, M. W., Beckmann, C. F., Behrens, T. E., Johansen-  
4 Berg, H., Bannister, P. R., De Luca, M., Drobnjak, I., Flitney, D. E., Niazy, R. K.,  
5 Saunders, J., Vickers, J., Zhang, Y., De Stefano, N., Brady, J. M., & Matthews, P. M.  
6 (2004). Advances in functional and structural MR image analysis and implementation  
7 as FSL. *Neuroimage*, 23 Suppl 1, S208-219.  
8 <https://doi.org/10.1016/j.neuroimage.2004.07.051>
- 9 Suarez, L. E., Markello, R. D., Betzel, R. F., & Misic, B. (2020). Linking Structure and  
10 Function in Macroscale Brain Networks. *Trends Cogn Sci*, 24(4), 302-315.  
11 <https://doi.org/10.1016/j.tics.2020.01.008>
- 12 Taylor, R., & Bays, P. M. (2020). Theory of neural coding predicts an upper bound on  
13 estimates of memory variability. *Psychol Rev*, 127(5), 700-718.  
14 <https://doi.org/10.1037/rev0000189>
- 15 Thiebaut de Schotten, M., Dell'Acqua, F., Forkel, S. J., Simmons, A., Vergani, F., Murphy,  
16 D. G., & Catani, M. (2011). A lateralized brain network for visuospatial attention.  
17 *Nature Neuroscience*, 14(10), 1245-1246. <https://doi.org/10.1038/nn.2905>
- 18 Tournier, J. D., Smith, R., Raffelt, D., Tabbara, R., Dhollander, T., Pietsch, M., Christiaens,  
19 D., Jeurissen, B., Yeh, C. H., & Connelly, A. (2019). MRtrix3: A fast, flexible and  
20 open software framework for medical image processing and visualisation.  
21 *Neuroimage*, 202, 116137. <https://doi.org/10.1016/j.neuroimage.2019.116137>
- 22 Veraart, J., Novikov, D. S., Christiaens, D., Ades-Aron, B., Sijbers, J., & Fieremans, E.  
23 (2016). Denoising of diffusion MRI using random matrix theory. *Neuroimage*, 142,  
24 394-406. <https://doi.org/10.1016/j.neuroimage.2016.08.016>
- 25 Vestergaard, M., Madsen, K. S., Baare, W. F., Skimminge, A., Ejersbo, L. R., Ramsøy, T. Z.,  
26 Gerlach, C., Akesson, P., Paulson, O. B., & Jernigan, T. L. (2011). White matter  
27 microstructure in superior longitudinal fasciculus associated with spatial working  
28 memory performance in children. *J Cogn Neurosci*, 23(9), 2135-2146.  
29 <https://doi.org/10.1162/jocn.2010.21592>
- 30 Wager, T. D., & Smith, E. E. (2003). Neuroimaging studies of working memory: a meta-  
31 analysis. *Cogn Affect Behav Neurosci*, 3(4), 255-274.  
32 <https://doi.org/10.3758/cabn.3.4.255>
- 33 Walsh, M., Montojo, C. A., Sheu, Y. S., Marchette, S. A., Harrison, D. M., Newsome, S. D.,  
34 Zhou, F., Shelton, A. L., & Courtney, S. M. (2011). Object working memory  
35 performance depends on microstructure of the frontal-occipital fasciculus. *Brain*  
36 *Connect*, 1(4), 317-329. <https://doi.org/10.1089/brain.2011.0037>
- 37 Warrington, S., Bryant, K. L., Khrapitchev, A. A., Sallet, J., Charquero-Ballester, M.,  
38 Douaud, G., Jbabdi, S., Mars, R. B., & Sotiropoulos, S. N. (2020). XTRACT -  
39 Standardised protocols for automated tractography in the human and macaque brain.  
40 *Neuroimage*, 217, 116923.  
41 <https://doi.org/https://doi.org/10.1016/j.neuroimage.2020.116923>
- 42 Woodman, G. F., & Vogel, E. K. (2008). Selective storage and maintenance of an object's  
43 features in visual working memory. *Psychonomic Bulletin & Review*, 15(1), 223-229.  
44 <https://doi.org/10.3758/PBR.15.1.223>
- 45 Xu, Y., & Chun, M. M. (2006). Dissociable neural mechanisms supporting visual short-term  
46 memory for objects. *Nature*, 440(7080), 91-95. <https://doi.org/10.1038/nature04262>
- 47 Zhang, H., Schneider, T., Wheeler-Kingshott, C. A., & Alexander, D. C. (2012). NODDI:  
48 practical in vivo neurite orientation dispersion and density imaging of the human  
49 brain. *Neuroimage*, 61(4), 1000-1016.  
50 <https://doi.org/10.1016/j.neuroimage.2012.03.072>

- 1 Zhang, W., & Luck, S. J. (2008). Discrete fixed-resolution representations in visual working
- 2 memory. *Nature*, 453(7192), 233-235. <https://doi.org/10.1038/nature06860>
- 3 Zhang, Y., Brady, M., & Smith, S. (2001). Segmentation of brain MR images through a
- 4 hidden Markov random field model and the expectation-maximization algorithm.
- 5 *IEEE Trans Med Imaging*, 20(1), 45-57. <https://doi.org/10.1109/42.906424>
- 6
- 7
